# Supplementary figures and images for: Farrerol Induces Cancer Cell Death via ERK Activation in SKOV3 Cells and Attenuates TNF-α-Mediated Lipolysis
Source: MDPI journal article supplement (doi:10.3390/ijms22179400), 2021-08-30

Figure S1

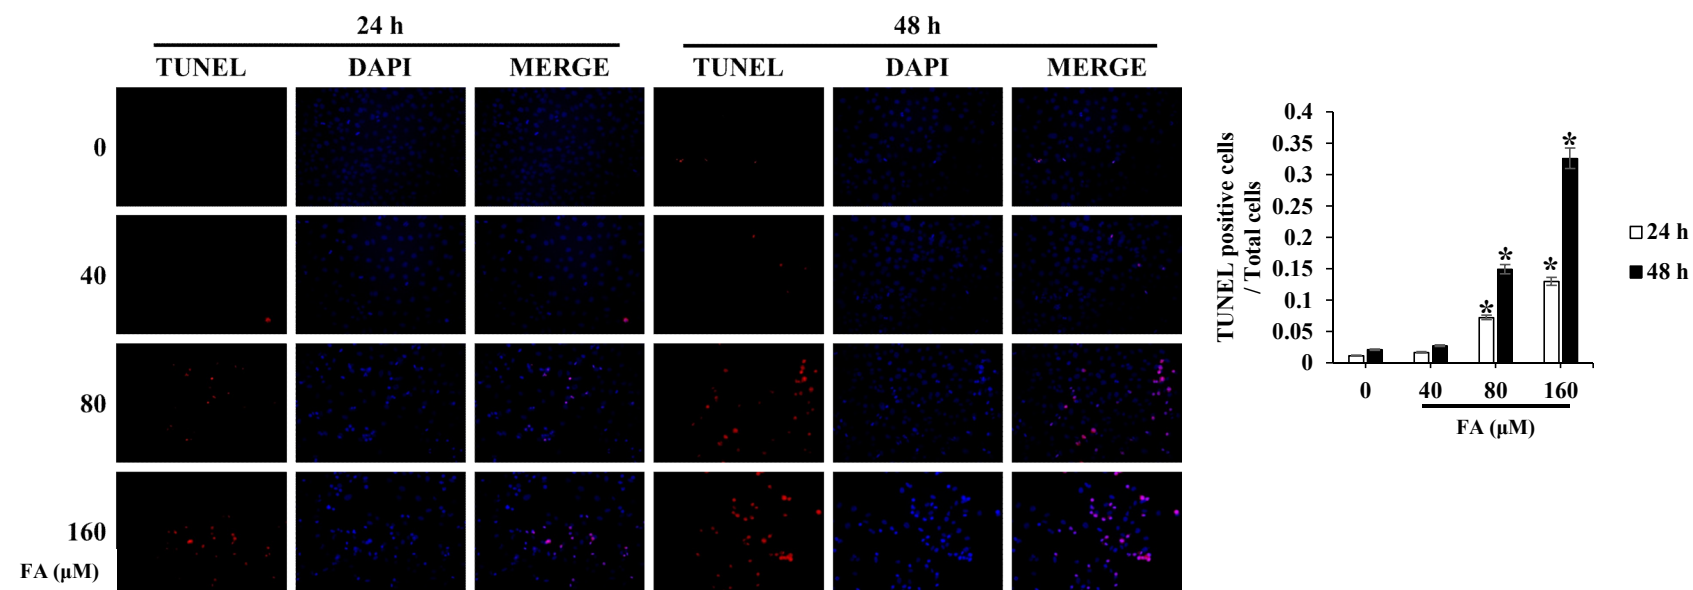

Figure S2

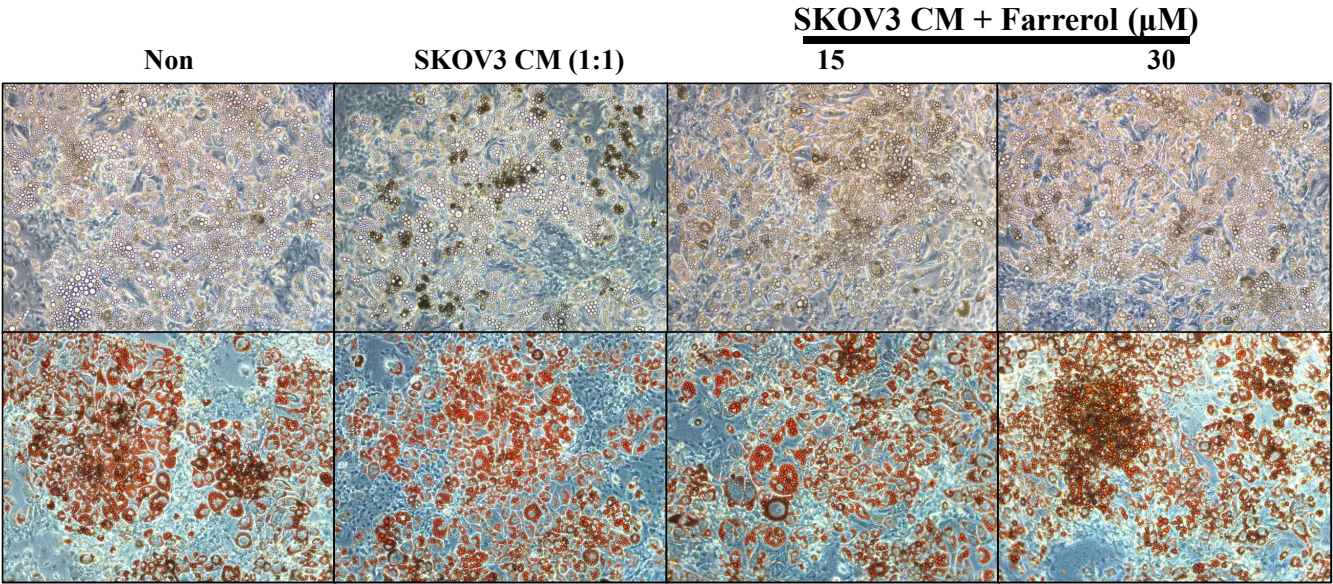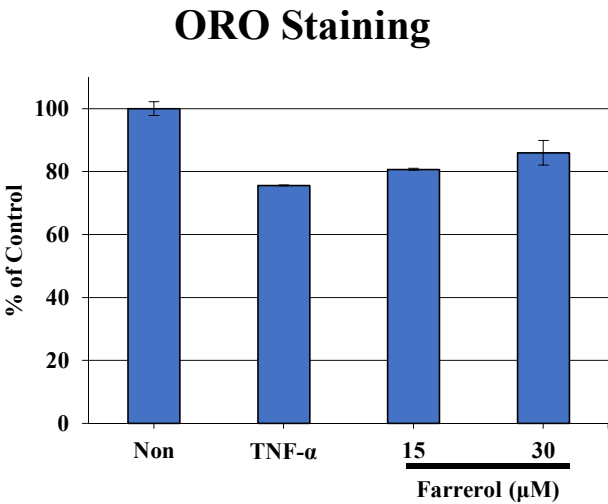

Supplement: s1 [file s1]
